# Supplementary material
Source: MDPI journal article supplement (https://www.mdpi.com/2036-7422/12/3/34)
Supplement: s1 [file gastroent-1328083-supplementary.pdf › gastroent-1328083-supplementary.pdf]

### *Supplementary Material*

#### **COVID-19 Survey**

This questionnaire must be applied by health personnel, prior to performing procedures on all patients entering the ward.

Name: \_\_\_\_\_ Age: \_\_\_\_\_

Address: \_\_\_\_\_ Phone: \_\_\_\_\_

#### **Answer + or -**

|          |                                                                                                                                          |  |
|----------|------------------------------------------------------------------------------------------------------------------------------------------|--|
| <b>1</b> | <b>Have or did you have fever? (Over 37,8°C)</b>                                                                                         |  |
| <b>2</b> | <b>Have you had headaches?</b>                                                                                                           |  |
| <b>3</b> | <b>Have you had respiratory symptoms such as dry cough, sore throat, loss of smell and/or taste, runny nose, or shortness of breath?</b> |  |
| <b>4</b> | <b>Have you had any digestive symptoms lately?</b>                                                                                       |  |
| <b>5</b> | <b>Have you been in direct contact with someone under suspicion or confirmation of COVID19 infection?</b>                                |  |
| <b>6</b> | <b>Have you traveled abroad or to other areas of the country with confirmed COVID-19 cases in the last 14 days?</b>                      |  |
| <b>7</b> | <b>Are you currently under quarantine? Or have you been indicated to do it previously?</b>                                               |  |
| <b>8</b> | <b>Have you taken a test for COVID-19 infection in the last 24–48 h?</b>                                                                 |  |
| <b>9</b> | <b>Have you been diagnosed with COVID-19?</b>                                                                                            |  |
